# Supplementary material for: Ir4+-Doped NiFe LDH to expedite hydrogen evolution kinetics as a Pt-like electrocatalyst for water splitting
Source: Royal Society of Chemistry journal article supplement (doi:10.1039/c8cc02872a), 2018-01-01
Supplement: c8cc02872a1.pdf [file c8cc02872a1.pdf]

## Electronic Supplementary Information

### **Ir<sup>4+</sup>-doped NiFe LDH to Expedite Hydrogen Evolution Kinetics as Pt-like Electrocatalyst for Water Splitting**

Qian-Qian Chen,<sup>ab</sup> Chun-Chao Hou,<sup>a</sup> Chuan-Jun Wang,<sup>a</sup> Xiao Yang,<sup>ab</sup> Rui  
Shi<sup>a</sup> and Yong Chen<sup>\*ab</sup>

<sup>a</sup> Key Laboratory of Photochemical Conversion and Optoelectronic Materials & HKU-CAS Joint Laboratory on New Materials, Technical Institute of Physics and Chemistry, Chinese Academy of Sciences, Beijing 100190, People's Republic of China

<sup>b</sup> University of Chinese Academy of Sciences Beijing 100149, People's Republic of China

\*Corresponding author

E-mail: chenryong@mail.ipc.ac.cn

**Materials:** All chemicals used in the experiments were analytical grade and used without further treatments.

**The synthesis of NiFeIr LDH/NF:** The NiFeIr LDH was grown in situ under hydrothermal conditions. Ni foam ( $1\text{ cm} \times 3.6\text{ cm} \times 1.6\text{ mm}$ ) was ultra-sonicated for 30 min in 3 M HCl, deionized water and ethanol, respectively. In a typical procedure, 88 mg  $\text{Ni}(\text{NO}_3)_2 \cdot 6\text{H}_2\text{O}$  and 130 mg urea were first dissolved in 15 mL  $\text{H}_2\text{O}$ . Then, 97 mg  $\text{Fe}(\text{NO}_3)_3 \cdot 9\text{H}_2\text{O}$  were added to the above solution. Finally, 3 mL 20 mM  $\text{H}_2\text{IrCl}_6$  solution was added to the solution and stirred for 30 min to obtain a clear solution. The final solution was poured into a 25 mL reaction vessel containing a piece of Ni foam. The sealed reactor was put into an oven at  $120\text{ }^\circ\text{C}$  with a heating rate of  $3.5\text{ }^\circ\text{C min}^{-1}$  and kept at this temperature for 12 h. The weight of catalyst is about  $1.43\text{ mg cm}^{-2}$ .

**The preparation of Pt/C electrode:** In a typical synthesis, 25 mg commercial 10% Pt/C was dispersed in 1 mL water containing 100  $\mu\text{L}$  Nafin solution, and then the mixture was ultra-sonicated for more than 1 h to generate a catalyst ink. Next, 15  $\mu\text{L}$  of the dispersion was dropped onto  $0.5 \times 0.5\text{ cm}^{-2}$  Ni foam ( $1.5\text{ mg cm}^{-2}$ ). Finally, the as-prepared electrode was dried at room temperature for two days.

## Characterization

The structure of the catalysts were investigated by Powder X-ray patterns (PXRD) on a Bruker AXSD8 X-ray diffractometer with  $\text{Cu K}_\alpha$  radiation ( $\lambda = 1.5406\text{ \AA}$ ). The Scanning electron microscope (SEM) images of catalysts and corresponding energy-dispersion X-ray mapping were obtained at a Hitachi S-4800 field emission scanning electron microscope. Samples for transmission electron microscopy (TEM) and high resolution transmission electron microscopy (HRTEM) were analyzed by using a transmission electron microscope (JEM 2100). X-ray photoelectron spectroscopy (XPS) spectra were firstly deoxygenated under Ar overnight and then investigated on

a ThermoScientific ESCALAB 250XI spectroscopy equipped with an Al K $\alpha$  X-ray source and a power of 250 W was used. The charge effect was calibrated using the binding energy of C (1s) (284.8 eV). Raman spectroscopy measurements were performed on an inVia-Reflex confocal laser micro-Raman spectrometer using Ar<sup>+</sup> laser excitation ( $\lambda_{\text{ex}}$  = 532 nm). Hydrogen was measured by a gas chromatograph (GC-14C, Shimadzu, with Ar as a carrier gas), which was equipped with a 5 Å molecular sieve column (3 m  $\times$  2mm) and a thermal-conductivity detector.

## Electrochemical measurements

The electrochemical tests were performed on CHI660E electrochemical workstation and carried out in a standard three-electrode cell in 1 M KOH solution (pH = 13.7), using a carbon rod as the counter electrode for HER (but for OER using a Pt foil) and Ag/AgCl (3.5 M) as the reference electrode, which was calibrated by reversible hydrogen electrode (RHE):  $E(\text{RHE}) = E(\text{Ag/AgCl}) + 0.059 \times \text{pH} + 0.2046$ . Ni foam (0.5 cm  $\times$  1.2 cm) was used as the working electrode, but the actual area immersed in the electrolyte is 0.5 cm  $\times$  0.5 cm. During the measurement, H<sub>2</sub> is bubbled through electrolyte. The scan rate for the electrochemical measurements was 5 mV s<sup>-1</sup>. The ECSA was obtained by electrical double layer capacitor ( $C_{\text{dl}}$ ) in a small non-faradaic potential range from -0.6 to -0.7 V vs. Ag/AgCl. The Faradaic efficiency of NiFeIr LDH for HER was measured with chronopotentiometry model in N<sub>2</sub> saturated 1 M KOH solution.

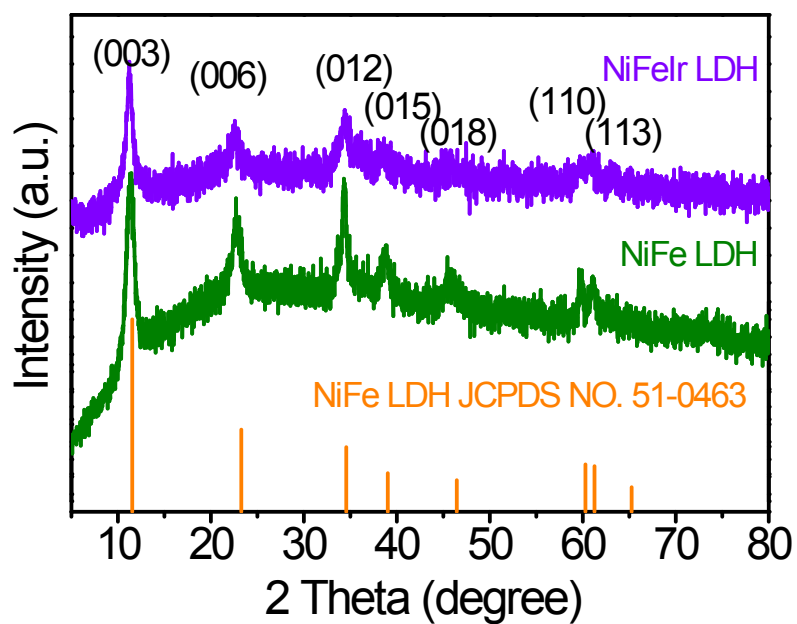

**Fig. S1** XRD spectra of NiFe LDH and NiFeIr LDH prepared without Ni foam substrate.

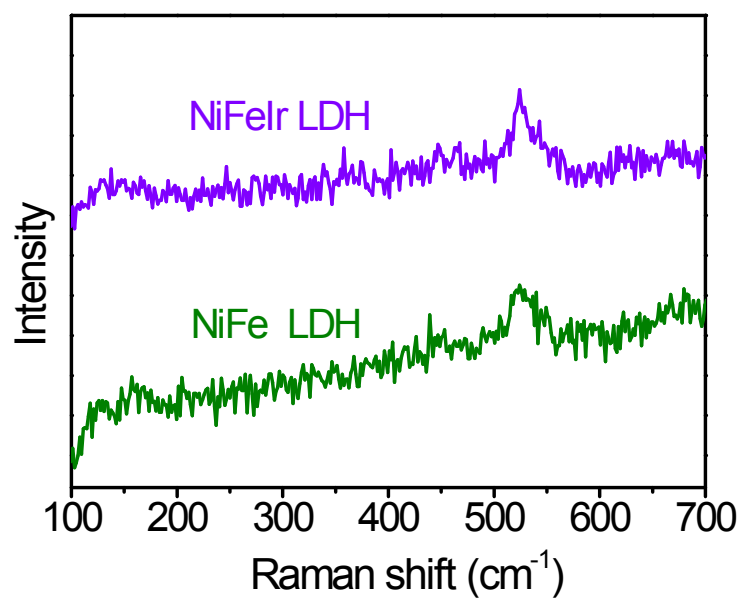

**Fig. S2** Raman spectra of NiFe LDH and NiFeIr LDH.

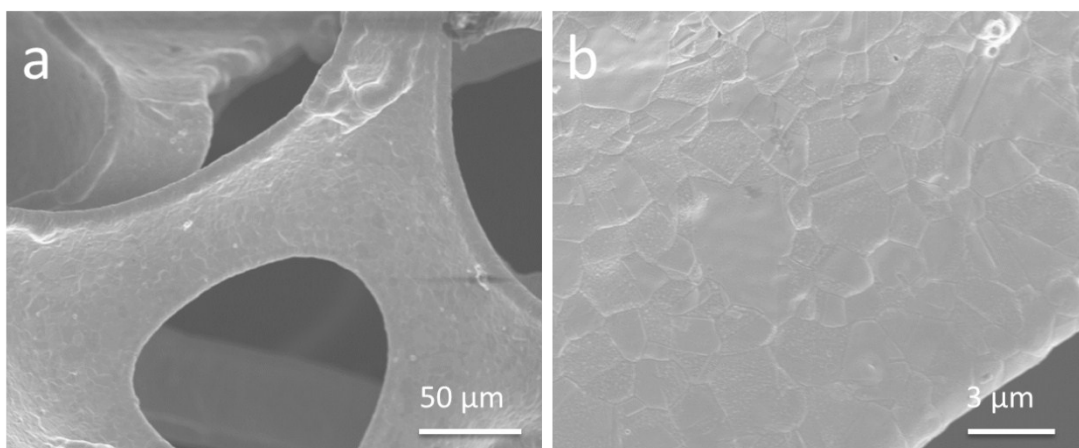

**Fig. S3** SEM images of Ni foam.

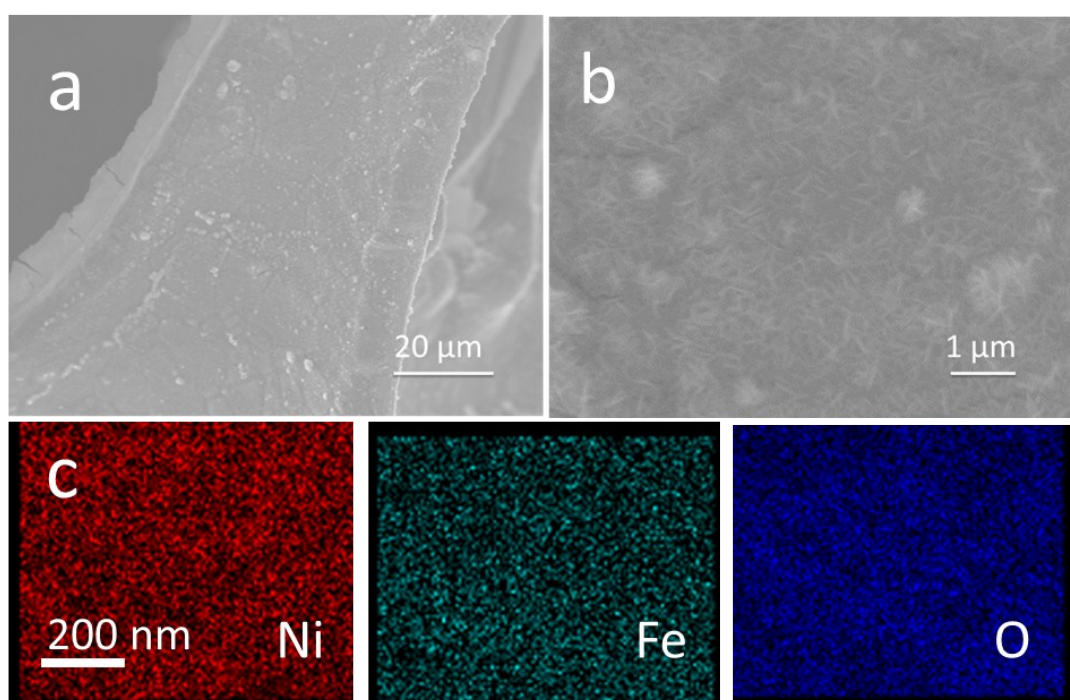

**Fig. S4** SEM images and EDS-corresponding mapping of NiFe LDH.

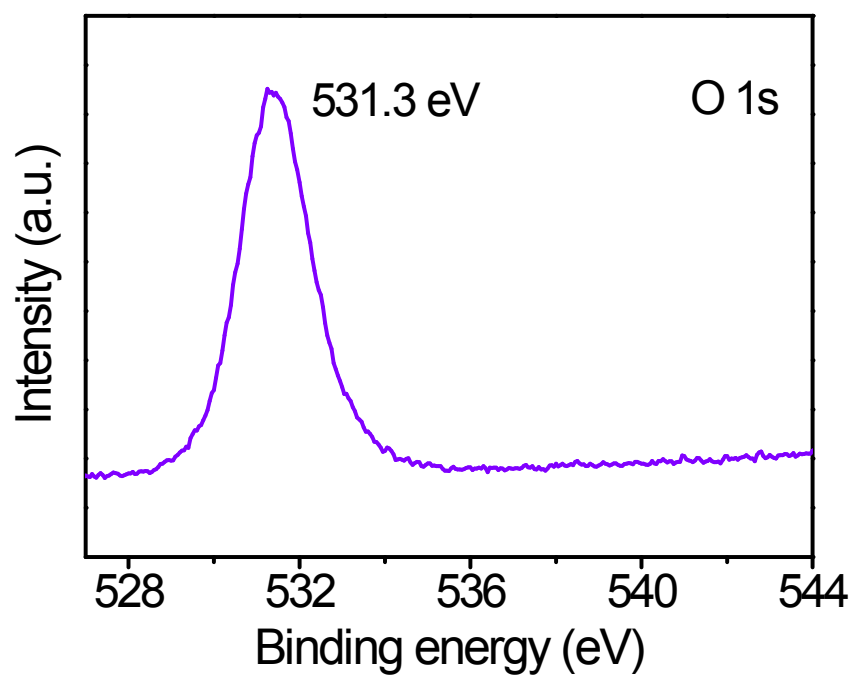

**Fig. S5** XPS spectrum of O 1s for NiFeIr LDH.

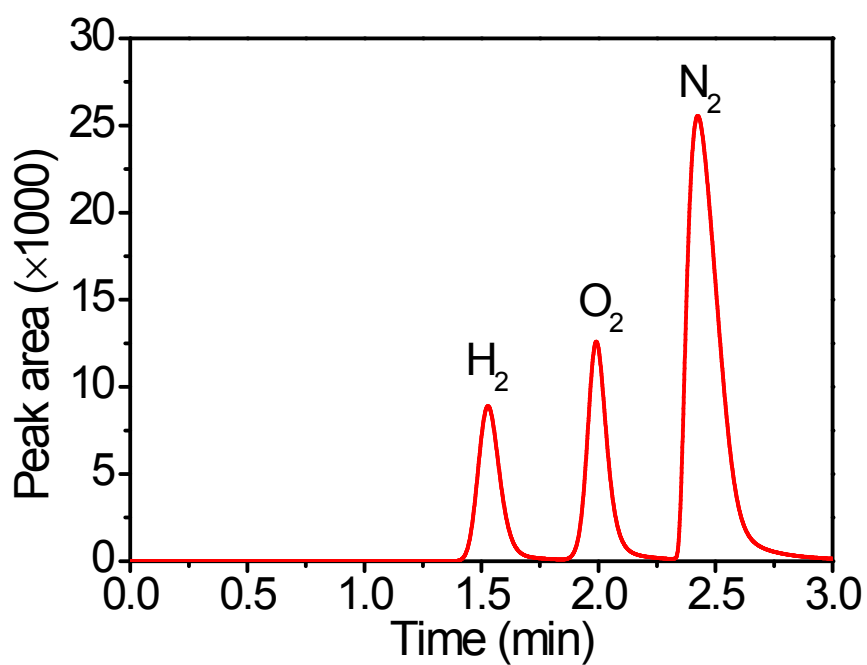

**Fig. S6** GC signals obtained from the closed electrolytic cell.

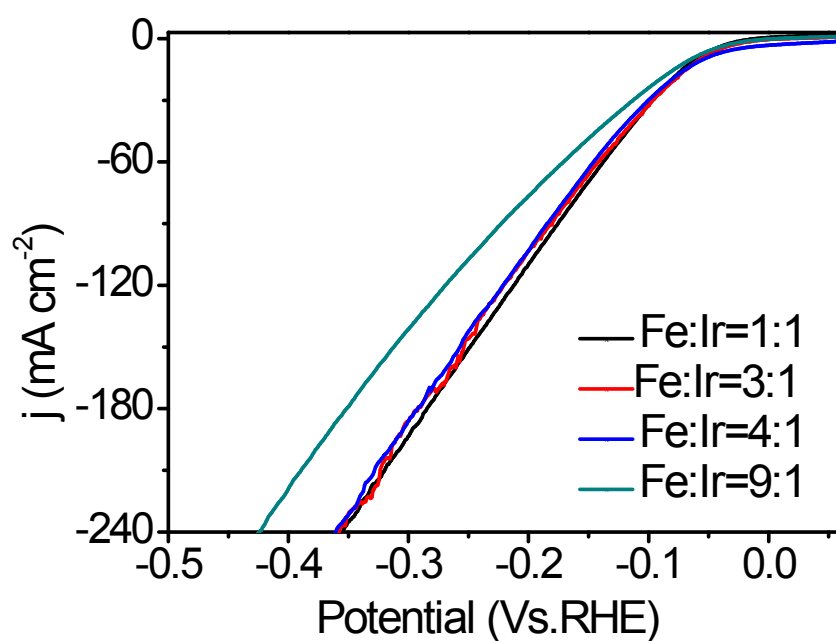

**Fig. S7** LSV curves of NiFeIr LDH in 1 M KOH with different feed ratio without iR compensation.

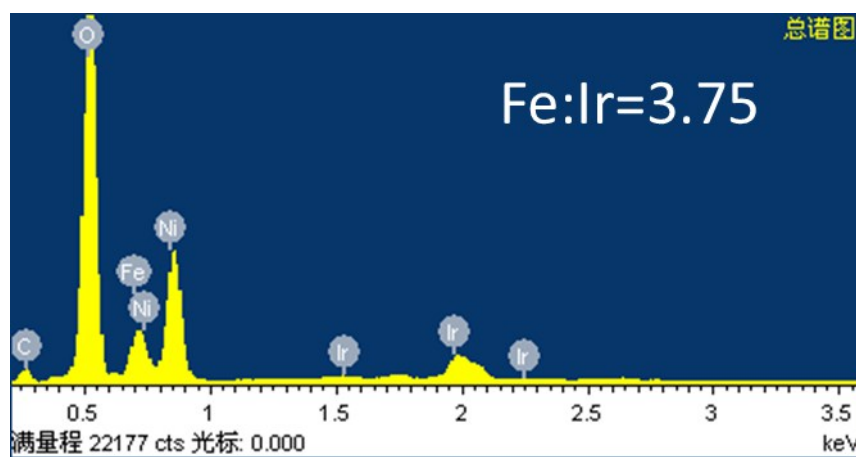

**Fig. S8** SEM-EDS spectrum of NiFeIr LDH.

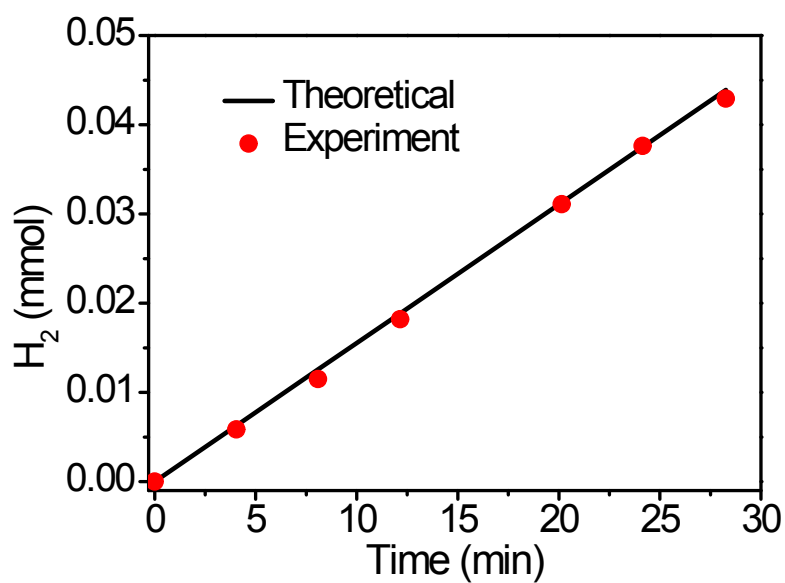

**Fig. S9** Theoretical and experiment hydrogen evolution at a current of 5 mA using NiFeIr LDH in 1 M KOH.

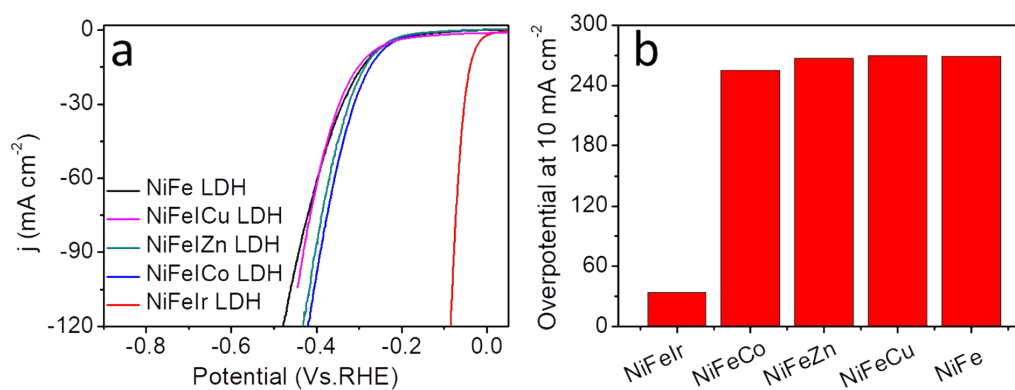

**Fig. S10** (a) LSV curves and (b) overpotentials at 10 mA cm<sup>-2</sup> for NiFe LDH, NiFeCu LDH, NiFeZn LDH, NiFeCo LDH and NiFeIr LDH.



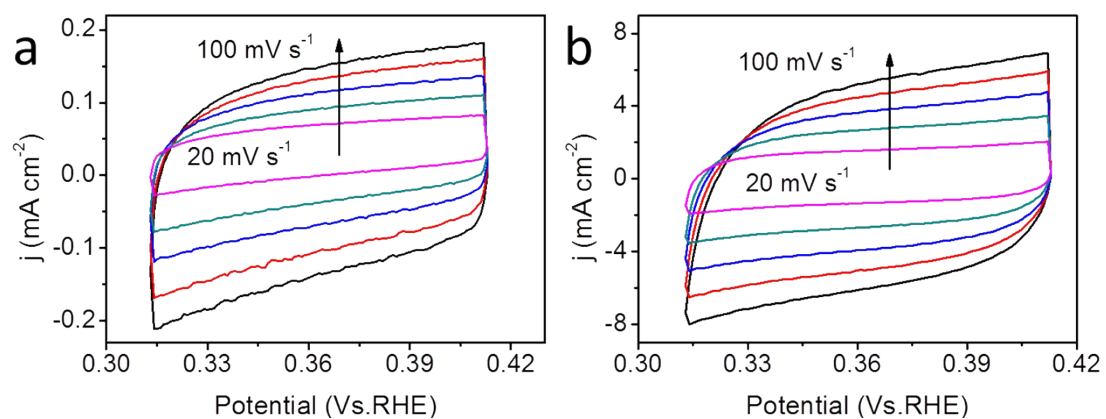

**Fig. S11** CV curves for the as-prepared NiFe LDH (a) and NiFeIr LDH (b).

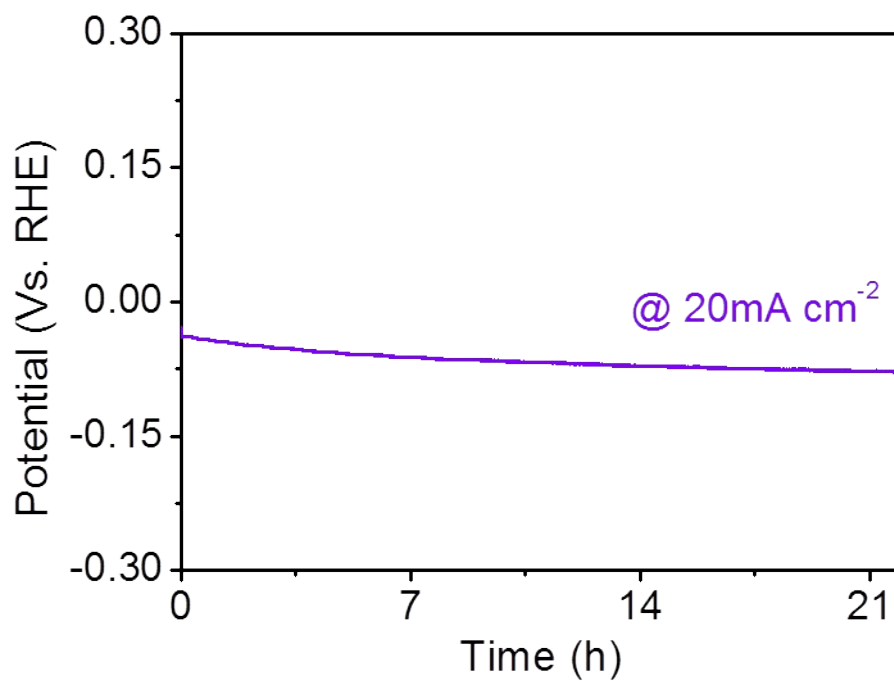

**Fig. S12** The long-time stability of NiFeIr LDH in a three-electrode system at 20 mA cm<sup>-2</sup>.

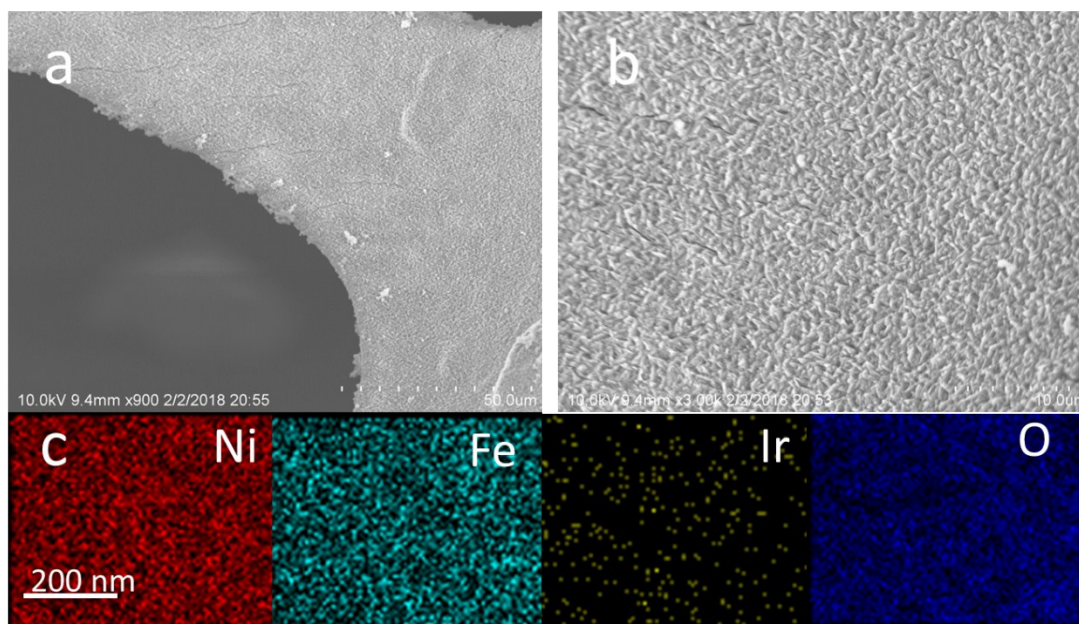

**Fig. S13** (a) SEM image, (b) Imaged SEM image and the corresponding EDX of NiFeIr LDH after stability test.

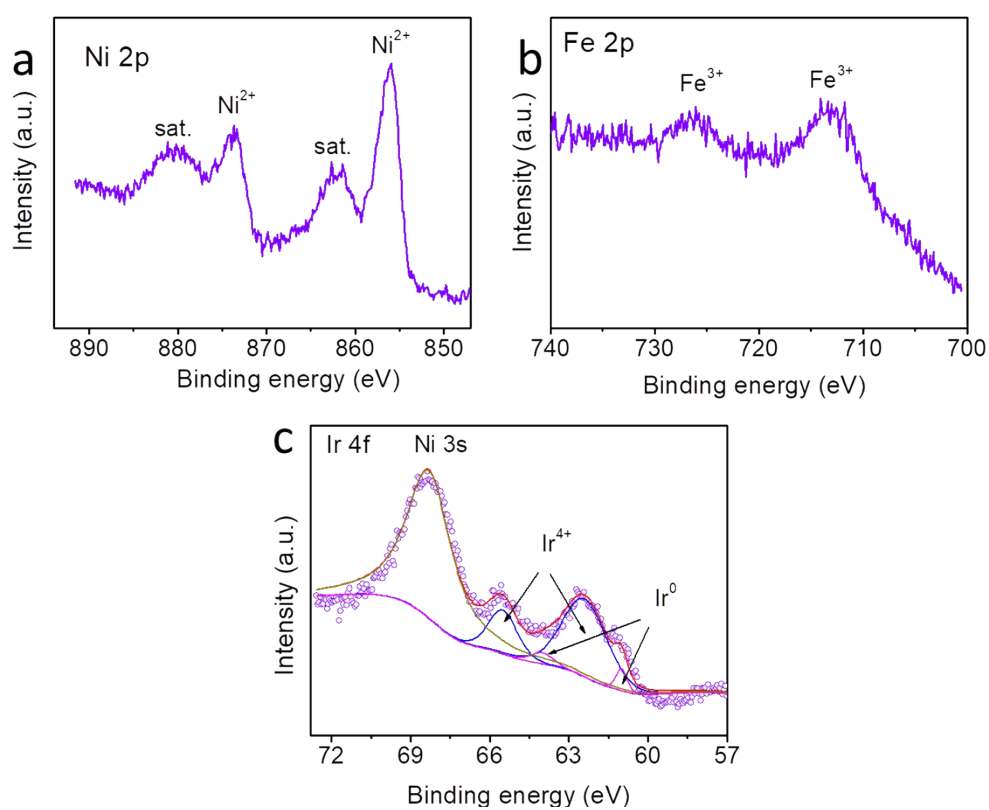

**Fig. S14** XPS spectra of a) Ni 2p, (b) Fe 2p and (c) Ir 4f for NiFeIr LDH after 22 h of HER at 20 mA cm<sup>-2</sup>.

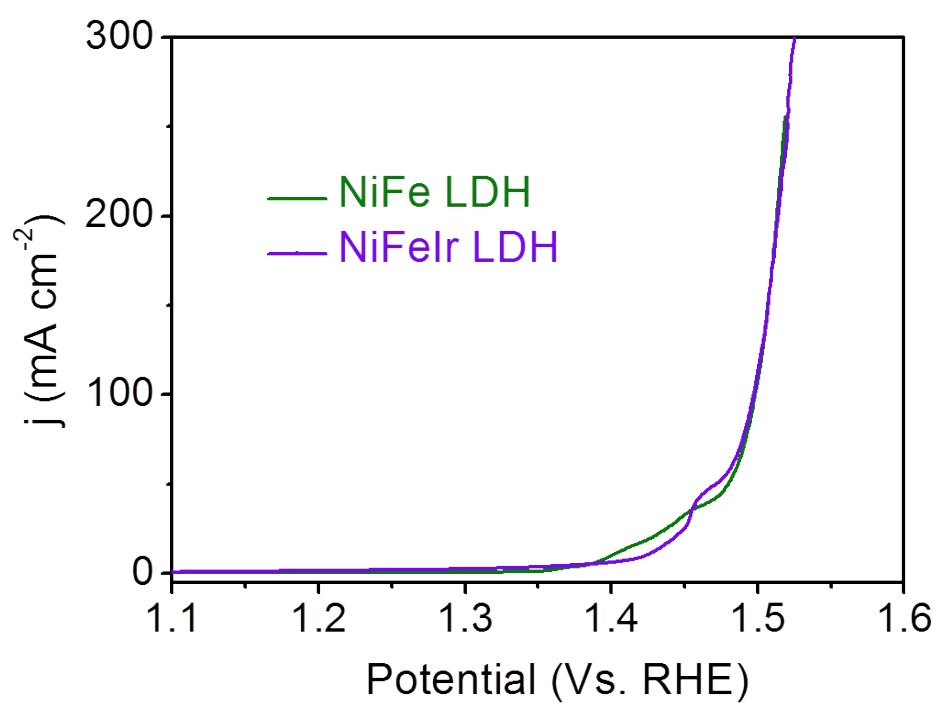

**Fig. S15** OER LSV curves of NiFe LDH and NiFeIr LDH in 1 M KOH with iR compensation.
